# Supplementary material for: Urban Pluvial Flood Management Part 1: Implementing an AHP-TOPSIS Multi-Criteria Decision Analysis Method for Stakeholder Integration in Urban Climate and Stormwater Adaptation
Source: MDPI journal article supplement (doi:10.3390/w13172422), 2021-09-03
Supplement: s1 [file s1]

AHP

Establish the AHP decision matrix

$$A = \begin{bmatrix} a_{11} & a_{12} & \cdots & a_{1n} \\ a_{21} & a_{22} & \cdots & a_{2n} \\ \vdots & \vdots & \ddots & \vdots \\ a_{n1} & a_{n2} & \cdots & a_{nn} \end{bmatrix}$$

Where:

(S1)

$$(i) \quad a_{ij} = \frac{1}{a_{ji}} \text{ for } i, j = 1, \dots, n \text{ and } i \neq j$$

$$(ii) \quad a_{ij} = 1 \text{ for } i, j = 1, \dots, n \text{ and } i = j$$

Normalizing the matrix by column

$$\hat{A} = \begin{bmatrix} \hat{a}_{11} & \hat{a}_{12} & \cdots & \hat{a}_{1n} \\ \vdots & \vdots & \ddots & \vdots \\ \hat{a}_{n1} & \hat{a}_{n2} & \cdots & \hat{a}_{nn} \end{bmatrix}$$

Where:

(S2)

$$(i) \quad \hat{a}_{ij} = \frac{a_{ij}}{\sum_{i=1}^n a_{ij}}$$

Define the priority weight vector by the geometric mean of the rows

$$\mathbf{w} = \begin{pmatrix} w_1 \\ w_2 \\ \vdots \\ w_n \end{pmatrix} = \begin{pmatrix} \sqrt[n]{\hat{a}_{11} \cdot \hat{a}_{12} \cdot \dots \cdot \hat{a}_{1n}} \\ \sqrt[n]{\hat{a}_{21} \cdot \hat{a}_{22} \cdot \dots \cdot \hat{a}_{2n}} \\ \vdots \\ \sqrt[n]{\hat{a}_{n1} \cdot \hat{a}_{n2} \cdot \dots \cdot \hat{a}_{nn}} \end{pmatrix}$$

(S3)

Where:

$$(i) \quad w_i > 0 \text{ and } i = 1, 2, \dots, n$$

$$(ii) \quad \sum_{i=1}^n w_i = 1$$

A note on consistency

In Saaty's consistency eigenvector method,  $\mathbf{w}$  is the eigenvector of the matrix so that  $\lambda$  would be the principle eigenvalue of the vector in accordance with the Perron-Frobenius theorem and  $\lambda = n$ . Equation S4 demonstrates a relationship with matrix  $A$  assuming perfect consistency. However, because of inconsistency, Saaty proposes supplementing  $\lambda$  with the  $\lambda_{max}$  where  $\lambda_{max} > n$  and the difference between  $\lambda_{max}$  and  $n$  is representative of the inconsistency of the judgements.

$$A\mathbf{w} = \lambda\mathbf{w}$$

(S4)

Where

- (i)  $\lambda$  is the principle eigenvalue of matrix  $A$

Geometric consistency index for the geometric mean priority weight vector method

$$GCI = \frac{2}{(n-1)(n-2)} \sum_{\substack{i,j=1 \\ i < j}}^n \ln^2 e_{ij} \quad (S5)$$

Where

- (i)  $e_{ij} = a_{ij}w_j/w_i$  is the error obtained when the ratio  $w_i/w_j$  is approximated by  $a_{ij}$

Determine the consistency measure of each participant in group aggregation.

$$CM^k = 1 - CR^k$$

Where:

- (i)  $k = 1, 2, \dots, r$  for the set of decision-makers

Determine the individual aggregation weight of each participant.

$$aiw^k = \frac{CM^k}{\sum_{k=1}^r CM^k} \quad (S7)$$

Where:

- (i)  $\sum_{k=1}^r aiw^k = 1$

Determine the group priority weight vector

$$\bar{w} = \prod_{k=1}^r (w^k)^{(aiw^k)}$$

So that:

$$\bar{w} = \begin{pmatrix} w_1^1 \\ w_2^1 \\ \dots \\ w_n^1 \end{pmatrix}^{aiw^1} \cdot \begin{pmatrix} w_1^2 \\ w_2^2 \\ \dots \\ w_n^2 \end{pmatrix}^{aiw^2} \cdot \dots \cdot \begin{pmatrix} w_1^K \\ w_2^K \\ \dots \\ w_n^K \end{pmatrix}^{aiw^K} = \begin{pmatrix} \bar{w}_1 \\ \bar{w}_2 \\ \dots \\ \bar{w}_n \end{pmatrix} \quad (S8)$$

Normalize the group priority weight vector

$$\hat{w} = \frac{\bar{w}_i}{\sum_{i=1}^n \bar{w}_i} = \begin{pmatrix} \hat{w}_1 \\ \hat{w}_2 \\ \dots \\ \hat{w}_n \end{pmatrix} \quad (S9)$$

Determine the global weights on the criteria considering their parent criterion

$$w_{\text{global sub-criteria matrix}} = \hat{w}_i \hat{w}_{\text{sub-criteria matrix}}$$

Where:

- (i)  $w_i$  is the weight of the parent criterion in the decision hierarchy from the aggregated parent priority weight vector defined in equation S9

(S10)

Definition of the final global priority weight vector for all criteria interacting with the alternatives.

$$w = \begin{pmatrix} w_1 \\ w_2 \\ \dots \\ w_n \end{pmatrix}$$

Where:

- (i)  $w_j$  is the global weight of criterion  $j$  that interacts with the alternatives in the decision tree
- (ii)  $w_j > 0$  and  $j = 1, \dots, n$
- (iii)  $\sum_{j=1}^n w_j = 1$

(S11)

### TOPSIS

Establish the TOPSIS decision matrix

$$B^k = \begin{matrix} & \begin{matrix} C_1 & C_2 & \dots & C_n \end{matrix} \\ \begin{matrix} A_1 \\ A_2 \\ \vdots \\ A_m \end{matrix} & \begin{bmatrix} f_{11} & f_{12} & \dots & f_{1n} \\ f_{21} & f_{22} & \dots & f_{2n} \\ \vdots & \vdots & \ddots & \vdots \\ f_{m1} & f_{m2} & \dots & f_{mn} \end{bmatrix} \end{matrix}$$

Where:

- (i)  $A_i$  represents the alternative  $i$  and  $C_j$  represents the criteria  $j$ , for  $i = 1, \dots, m$  and  $j = 1, \dots, n$
- (ii) And  $f_{ij}$  represents the performance rating of  $A_i$  under  $C_j$
- (iii) For  $k=1,2,\dots,r$  for the number of decision-makers

(S12)

Normalize the TOPSIS matrix

$$Z^k = \begin{bmatrix} z_{11} & z_{12} & \cdots & z_{1n} \\ z_{21} & z_{22} & \cdots & z_{2n} \\ \vdots & \vdots & \ddots & \vdots \\ z_{m1} & z_{m2} & \cdots & z_{mn} \end{bmatrix}$$

Where: (S13)

$$(i) \quad z_{ij} = \frac{f_{ij}}{\sqrt{\sum_{i=1}^m f_{ij}^2}}$$

Determine the Positive Ideal Solution (PIS) for each criterion

$$Z^{k+} = \{(Max \ z_{ij}^k | j \in J), (Min \ z_{ij}^k | j \in J') | i = 1, 2, \dots, m\} = \{z_1^{k+}, \dots, z_j^{k+} | j = 1, 2, \dots, n\}$$

Where:

$$(i) \quad J \text{ is associated with positive criteria or benefits while } J' \text{ is associated with negative criteria or costs} \quad (S14)$$

Determine the Negative Ideal Solution (NIS) for each criterion

$$Z^{k-} = \{(Min \ z_{ij}^k | j \in J), (Max \ z_{ij}^k | j \in J') | i = 1, 2, \dots, m\} = \{z_1^{k-}, \dots, z_j^{k-} | j = 1, 2, \dots, n\}$$

Where:

$$(i) \quad J \text{ is associated with positive criteria or benefits while } J' \text{ is associated with negative criteria or costs} \quad (S15)$$

Establish the separation distance of each alternative from the PIS

$$S_i^{k+} = \sqrt{\sum_{j=1}^n w_j (z_{ij}^k - z_j^{k+})^2}$$

Where:

$$(i) \quad w_j \text{ is the weight of criterion } j \text{ from the priority weight vector } \mathbf{w} \text{ defined in Equation S11}$$

So that:

$$S_i^{k+} = \left( \begin{array}{c} \sqrt{w_1(z_{i1}^k - z_1^{k+})^2 + w_2(z_{i2}^k - z_2^{k+})^2 + \cdots + w_n(z_{in}^k - z_n^{k+})^2} \\ \sqrt{w_1(z_{i21}^k - z_1^{k+})^2 + w_2(z_{i22}^k - z_2^{k+})^2 + \cdots + w_n(z_{i2n}^k - z_n^{k+})^2} \\ \vdots \\ \sqrt{w_1(z_{im1}^k - z_1^{k+})^2 + w_2(z_{im2}^k - z_2^{k+})^2 + \cdots + w_n(z_{imn}^k - z_n^{k+})^2} \end{array} \right) \quad (S16)$$

Establish the separation distance of each alternative from the NIS

$$S_i^{k-} = \sqrt{\sum_{j=1}^n w_j (z_{ij}^k - z_j^{k-})^2}$$

Where:

- (i)  $w_j$  is the weight of criterion  $j$  from the priority weight vector  $\mathbf{w}$  defined in Equation S11

so that:

(S17)

$$S_i^{k+} = \begin{pmatrix} \sqrt{w_1(z_{11}^k - z_1^{k-})^2 + w_2(z_{12}^k - z_2^{k-})^2 + \dots + w_j(z_{1j}^k - z_j^{k-})^2} \\ \sqrt{w_1(z_{21}^k - z_1^{k-})^2 + w_2(z_{22}^k - z_2^{k-})^2 + \dots + w_j(z_{2j}^k - z_j^{k-})^2} \\ \vdots \\ \sqrt{w_1(z_{i1}^k - z_1^{k-})^2 + w_2(z_{i2}^k - z_2^{k-})^2 + \dots + w_j(z_{ij}^k - z_j^{k-})^2} \end{pmatrix}$$

Aggregate the separation distances from the PIS' for the group

$$\overline{S}_i^+ = \left( \prod_{k=1}^r S_i^{k+} \right)^{1/r} = \begin{pmatrix} (S_1^{1+} \cdot S_1^{2+} \cdot \dots \cdot S_1^{r+})^{1/r} \\ (S_2^{1+} \cdot S_2^{2+} \cdot \dots \cdot S_2^{r+})^{1/r} \\ \vdots \\ (S_m^{1+} \cdot S_m^{2+} \cdot \dots \cdot S_m^{r+})^{1/r} \end{pmatrix} \quad (S18)$$

Aggregate the separation distances from the NIS' for the group

$$\overline{S}_i^- = \left( \prod_{k=1}^K S_i^{k-} \right)^{1/r} = \begin{pmatrix} (S_1^{1-} \cdot S_1^{2-} \cdot \dots \cdot S_1^{K-})^{1/r} \\ (S_2^{1-} \cdot S_2^{2-} \cdot \dots \cdot S_2^{K-})^{1/r} \\ \vdots \\ (S_m^{1-} \cdot S_m^{2-} \cdot \dots \cdot S_m^{K-})^{1/r} \end{pmatrix} \quad (S19)$$

Determine the closeness measure for each alternative

$$\overline{C}_i^* = \frac{\overline{S}_i^-}{\overline{S}_i^+ + \overline{S}_i^-} \quad (S20)$$

### Sensitivity

Initiate a disturbance on a weight and adjust the remaining weights in accordance.

$$\mathbf{w}' = \begin{pmatrix} w'_1 = \frac{w_1}{w_1 + w_2 + \dots w_q^* + \dots w_n} = \frac{w_1}{1 + (\gamma_q - 1)w_q} \\ w'_2 = \frac{w_2}{w_1 + w_2 + \dots w_q^* + \dots w_n} = \frac{w_2}{1 + (\gamma_q - 1)w_q} \\ \vdots \\ w'_q = \frac{w_q^*}{w_1 + w_2 + \dots w_q^* + \dots w_n} = \frac{\gamma_q w_q}{1 + (\gamma_q - 1)w_q} \\ \vdots \\ w'_n = \frac{w_n}{w_1 + w_2 + \dots w_q^* + \dots w_n} = \frac{w_n}{1 + (\gamma_q - 1)w_q} \end{pmatrix} \quad (S21)$$

Where:

- (i)  $w'_1, w'_2, w'_q$ , and  $w'_n$  are the new weights for criteria 1, 2, q, and n after the disturbance of  $w_q$
- (ii)  $\sum_{j=1}^n w'_j = 1$  and  $j = 1, \dots, n$

Establish the unitary variation ratio of the disturbed weight

$$\beta_q = \frac{w'_q}{w_q} \quad (S22)$$

The initial variation ratio in terms of the unitary variation ratio

$$\gamma_q = \frac{\beta_q - \beta_q w_q}{1 - \beta_q w_q} \quad (S23)$$
